# Supplementary material for: The inflammatory kinase IKKα phosphorylates and stabilizes c-Myc and enhances its activity
Source: PubMed Central journal article supplement (PMC7812655; doi:10.1186/s12943-021-01308-8), 2021-01-18

A

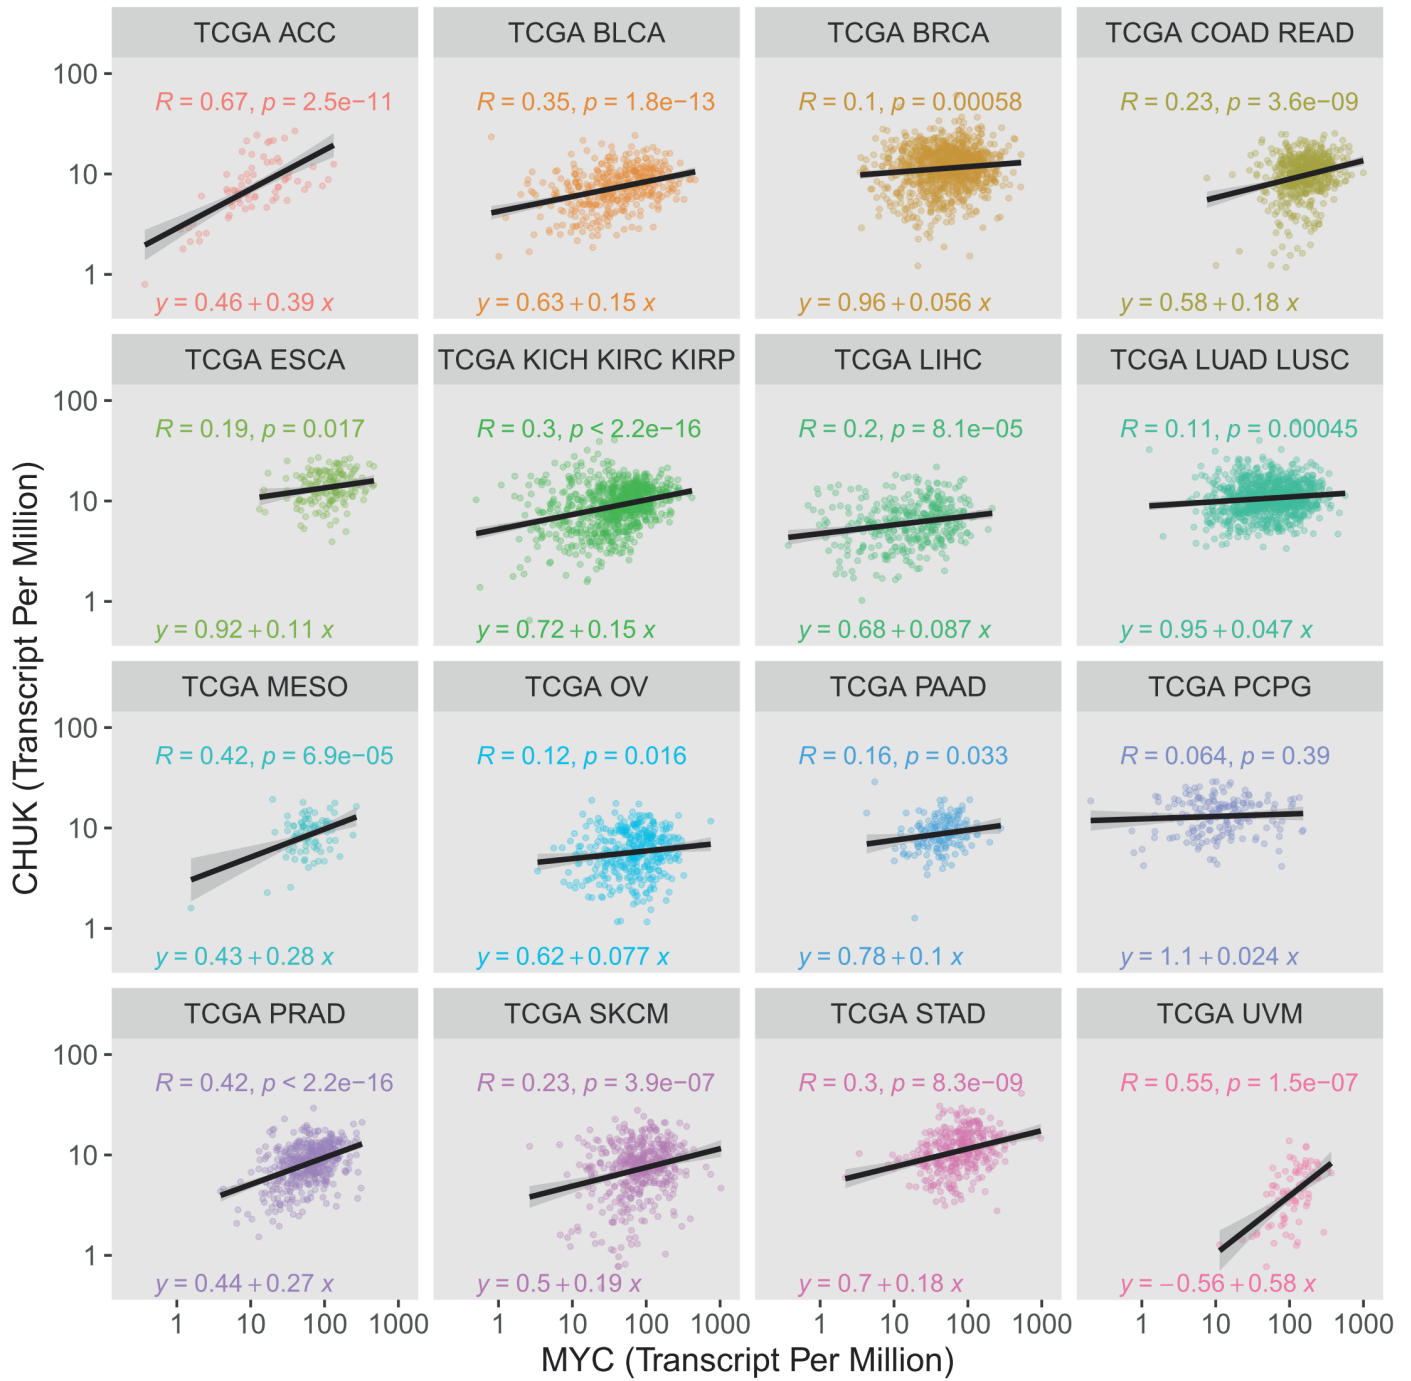

B

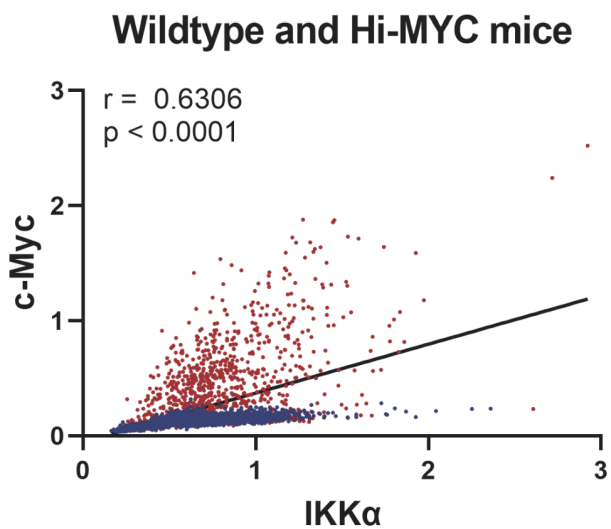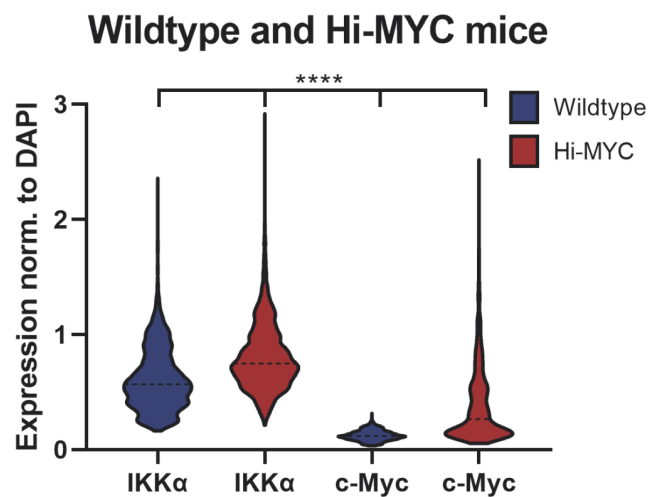

Supplement: 12943_2021_1308_MOESM4_ESM.pdf [file 12943_2021_1308_MOESM4_ESM.pdf]
