# Supplementary material for: The inflammatory kinase IKKα phosphorylates and stabilizes c-Myc and enhances its activity
Source: Springer Nature journal article supplement (doi:10.1186/s12943-021-01308-8), 2021-01-18

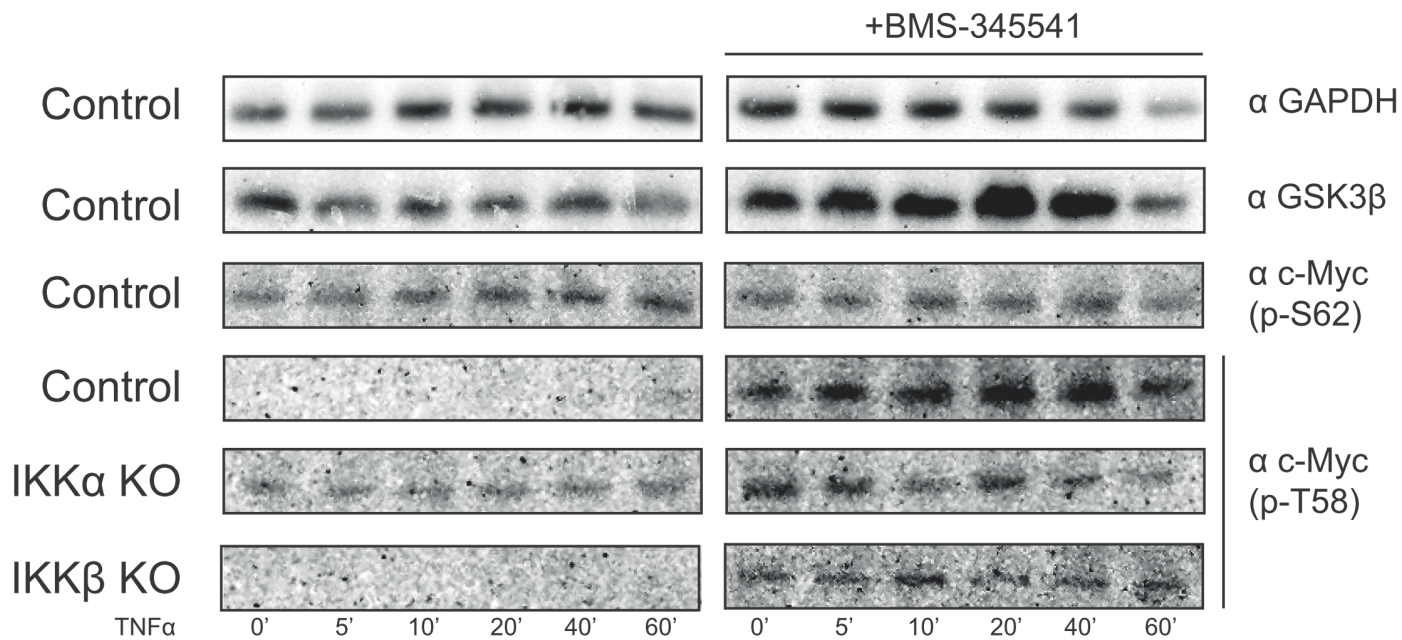

Supplement: MOESM2 [file 18776858]
