# Supplementary material for: The inflammatory kinase IKKα phosphorylates and stabilizes c-Myc and enhances its activity
Source: Springer Nature journal article supplement (doi:10.1186/s12943-021-01308-8), 2021-01-18

**A**

Stable DU145 transfectants

**c-MycAA****c-MycEE**

min CHX: 0 30 60 90 120 150

0 30 60 90 120 150

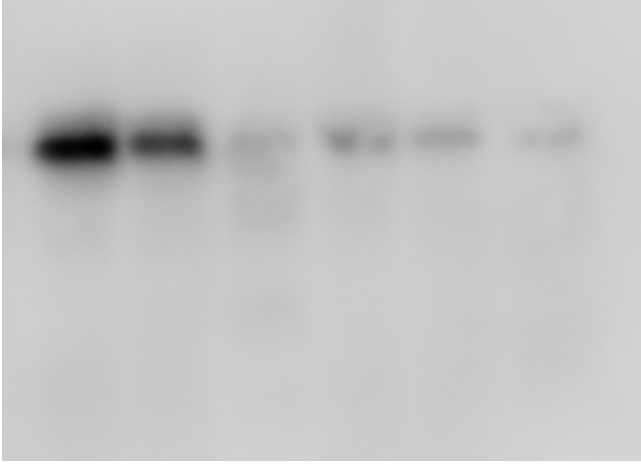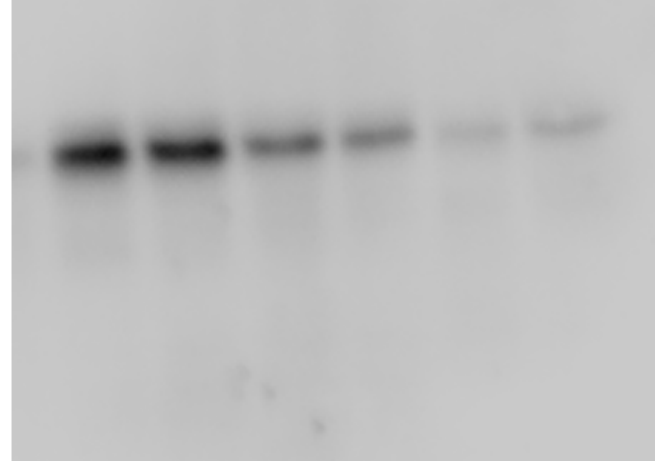**B****Dendra-tagged c-Myc variants**

Optical pulse-chase of transiently transfected HEK-293 cells

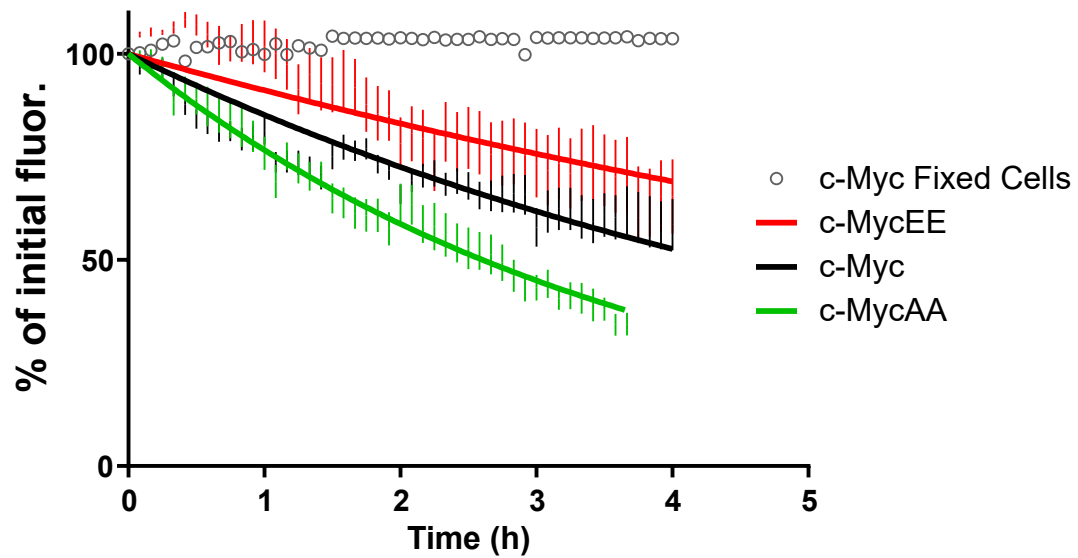

Supplement: MOESM3 [file 18776858]
